# Supplementary material
Source: publisher figshare collection journal article supplement (https://tandf.figshare.com/ndownloader/files/18527270)
Supplement: Supplementary file 1 [file 18527270]

Supplementary Table 1: Correlates of the utilisation of blood pressure monitors. The results of univariable logistic regression analyses.

|  | **OR (- 95% CI – +95% CI)** | | |
| --- | --- | --- | --- |
|  | **Equipped with BPM** | **Regular HBPM** | **Running BP diary** |
| Age > 65 yrs | 2.07 (1.73 - 2.47)# | 1.71 (1.44 - 2.02)# | 1.61 (1.41 - 1.84)# |
| Women | 1.59 (1.37 - 1.83)# | 1.53 (1.35 - 1.72)# | 1.95 (1.77 - 2.15)# |
| Higher education | 1.44 (1.26 - 1.66)# | 1.03 (0.91 - 1.16) | 1.17 (1.06 - 1.29)$ |
| Large cities dwellers | 0.89 (0.78 - 1.02) | 1.10 (0.98 - 1.23) | 1.19 (1.09 - 1.31)# |
| Professionally active | 2.74 (2.29 - 3.27)# | 1.01 (0.86 - 1.19) | 1.58 (1.38 - 1.81)# |
| Smokers | 0.95 (0.82 - 1.10) | 0.64 (0.56 - 0.72)# | 0.89 (0.81 - 0.99)* |
| Alcohol consumers | 0.60 (0.52 - 0.69)# | 0.71 (0.63 - 0.80)# | 0.48 (0.43 - 0.53)# |
| Physically active | 1.65 (1.40 - 1.95)# | 1.44 (1.26 - 1.65)# | 1.21 (1.08 - 1.35)$ |
| Obesity (BMI≥30 kg/m2) | 1.03 (0.80 – 1.36) | 0.96 (0.84 – 1.08) | 0.87 (0.79 – 0.97)* |
| Visceral obesity | 0.84 (0.73 - 0.97)* | 1.13 (1.00 - 1.28)* | 0.86 (0.78 - 0.96)$ |
| Diabetes | 1.39 (1.18 - 1.65)# | 1.71 (1.48 - 1.98)# | 1.25 (1.12 - 1.40)# |
| Dyslipidaemia | 1.38 (1.20 - 1.57)# | 0.51 (0.45 - 0.57)# | 0.90 (0.82 - 0.99)* |
| Coronary artery disease | 0.62 (0.53 - 0.73)# | 1.16 (1.00 - 1.34)* | 1.20 (1.07 - 1.34)$ |
| Heart failure | 0.60 (0.49 - 0.74)# | 0.67 (0.55 - 0.82)# | 0.67 (0.57 - 0.78)# |
| Peripheral artery disease | 0.87 (0.70 - 1.09) | 1.13 (0.92 - 1.39) | 0.89 (0.76 - 1.05) |
| Chronic kidney disease | 1.31 (0.96 - 1.78) | 1.23 (0.95 - 1.59) | 1.28 (1.04 - 1.57)* |
| Asthma / COPD | 1.77 (1.37 - 2.27)# | 0.69 (0.58 - 0.82)# | 1.00 (0.86 - 1.16) |
| Higher CV risk | 1.17 (1.00 - 1.36)* | 1.31 (1.15 - 1.49)# | 1.22 (1.10 - 1.36)# |
| HA treatment > 5 years | 1.15 (1.00 - 1.33) | 0.92 (0.81 - 1.04) | 1.15 (1.03 - 1.27)$ |
| Polytherapy of HA | 2.49 (2.15 - 2.89)# | 1.11 (0.97 - 1.27) | 1.51 (1.36 - 1.69)# |
| Controlled HA | 1.05 (0.90 - 1.21) | 0.96 (0.85 - 1.09) | 0.95 (0.86 - 1.06) |

* p < 0.05; $ p < 0.01; # p < 0.001

BMI - Body mass index, BP - Blood pressure, BPM - Beats per minute, CI - Confidence Interval, COPD - Chronic obstructive pulmonary disease, HA - Hypertension, HBPM - Home blood pressure monitoring, OR – Odds ratio, p-Value, probability
